# Supplementary material for: Layered polyaniline/graphene film from sandwich-structured polyaniline/graphene/polyaniline nanosheets for high-performance pseudosupercapacitors
Source: Royal Society of Chemistry journal article supplement (doi:10.1039/c3ta14671e), 2014-01-01
Supplement: c3ta14671e.pdf [file c3ta14671e.pdf]

Supporting Information for:

## Layered polyaniline/graphene film from sandwich-structured polyaniline/graphene/polyaniline nanosheets for high-performance pseudosupercapacitors

Zhongqiu Tong<sup>a</sup>, Yongning Yang<sup>a</sup>, Jiayu Wang<sup>a</sup>, Jiupeng Zhao<sup>\*b</sup>, Bao-Lian Su<sup>c</sup> and Yao Li<sup>\*a</sup>

<sup>a</sup> Center for Composite Materials and Structure, Harbin Institute of Technology, Harbin, 150001, China

<sup>b</sup> School of Chemical Engineering and Technology, Harbin Institute of Technology, Harbin, 150001, China

<sup>c</sup> Laboratory of Inorganic Materials Chemistry (CMI), University of Namur, 61, rue de Bruxelles, B-5000 Namur, Belgium

\*Corresponding author:

E-mail address: [yaoli@hit.edu.cn](mailto:yaoli@hit.edu.cn) (Prof. Y. Li); Fax: +86-451-86403767; [Tel:+86-451-86403767](tel:+86-451-86403767)

[jpzhao@hit.edu.cn](mailto:jpzhao@hit.edu.cn) (Prof. J. P. Zhao)

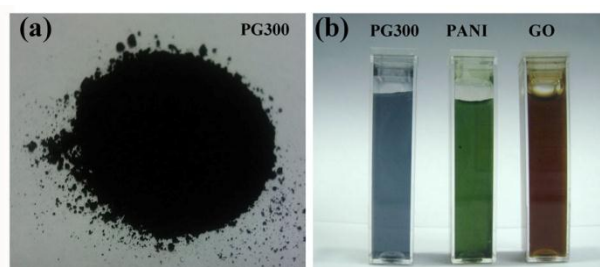

**Fig. S1.** (a) A digital picture of the PG300; (b) Dispersion stability of PG300, pure PANI and GO in water.

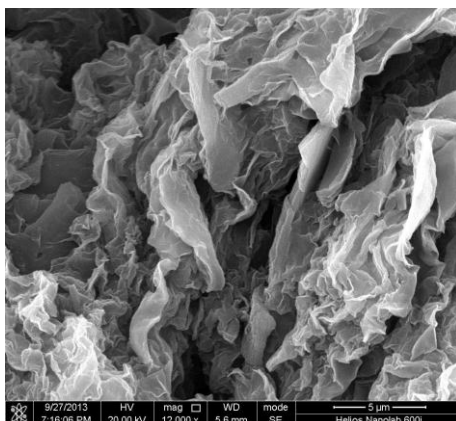

**Fig. S2.** SEM image of PG300.

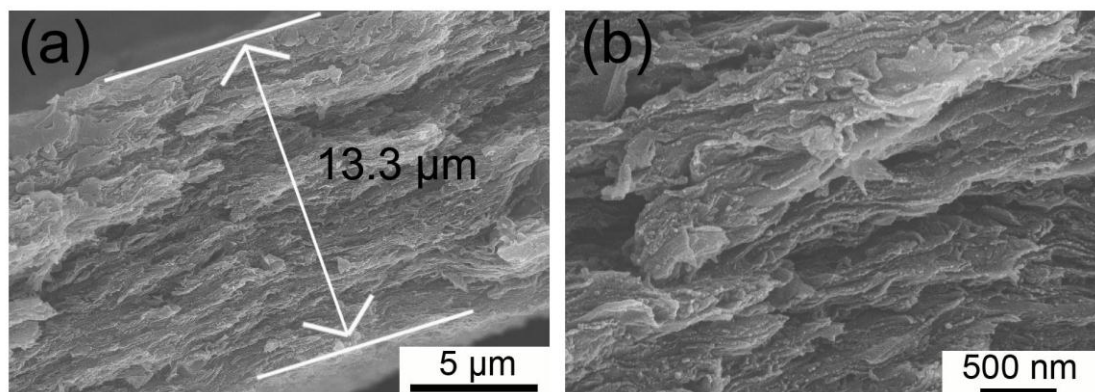

**Fig. S3.** Cross-section SEM image of PG300 at low magnification (a) and high magnification (b).

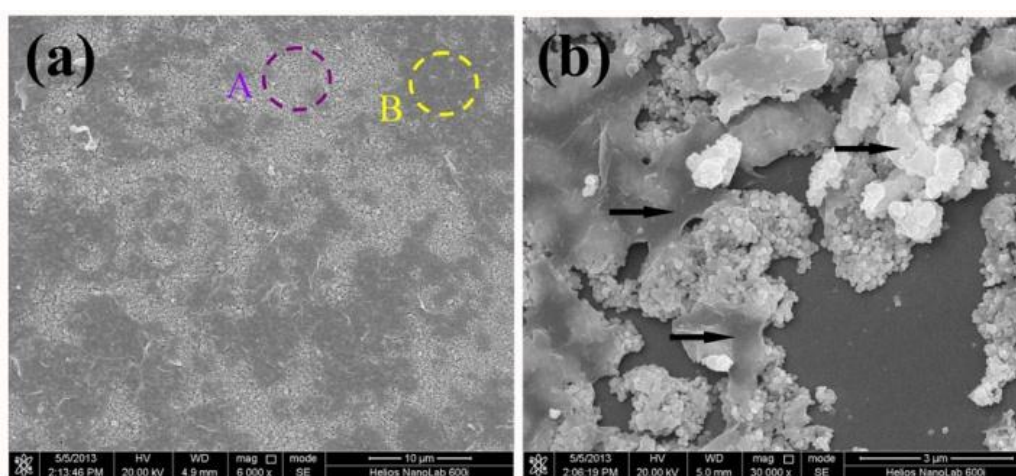

**Fig. S4.** SEM images of the as-deposited film from PG30 with various magnifications. Dotted line circle “A” exhibits the PANI particles, while the dotted line circle “B” and the nanosheets arrows pointed show the PANI/graphene/PANI sheets.

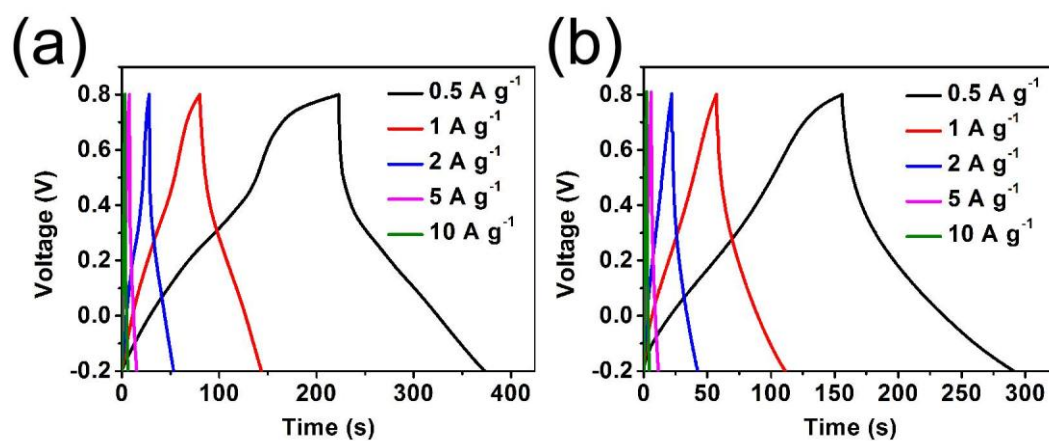

**Fig. S5.** Galvanostatic charge–discharge curves of PANI (a) and PG30 (b) at different current densities.

**Table S1** List of specific capacitance values of various graphene/PANI hybrid electrodes from recent literatures.

| Binder-free                   | Preparation method            | Specific capacitance          | Measurement condition           | Reference (year)          |             |
|-------------------------------|-------------------------------|-------------------------------|---------------------------------|---------------------------|-------------|
| Yes (our work)                | Electrophoretic deposition    | 384 F g <sup>-1</sup>         | 0.5 A g <sup>-1</sup>           | (2013)                    |             |
|                               |                               | 312 F g <sup>-1</sup>         | 1 A g <sup>-1</sup>             |                           |             |
|                               |                               | 324 F g <sup>-1</sup>         | At 20 mV s <sup>-1</sup> by CV  |                           |             |
| Yes                           | Layer-by-layer (LbL) assembly | 375.2 F g <sup>-1</sup>       | At 0.5 A g <sup>-1</sup>        | [1] (2012)                |             |
|                               |                               | ca. 225 F g <sup>-1</sup> (*) | At 1 A g <sup>-1</sup>          |                           |             |
|                               | Electropolymerization         | 233 F g <sup>-1</sup>         | At 20 mV s <sup>-1</sup> by CV  | [2] (2009)                |             |
|                               | Vacuum filtration             | 210 F g <sup>-1</sup>         | At 0.3 A g <sup>-1</sup>        | [3] (2010)                |             |
|                               | Electropolymerization         | 763 F g <sup>-1</sup>         | At 1 A g <sup>-1</sup>          | [4] (2013)                |             |
|                               | Chemical polymerization       | 250 F g <sup>-1</sup>         | At 100 mV s <sup>-1</sup> by CV | [5] (2012)                |             |
|                               | Vacuum filtration             | 301 F g <sup>-1</sup>         | At 0.5 A g <sup>-1</sup>        | [6] (2011)                |             |
|                               | Electropolymerization         | 202 F g <sup>-1</sup> (**)    | At 0.5 A g <sup>-1</sup>        | [7] (2013)                |             |
|                               |                               | 181 F g <sup>-1</sup> (**)    | At 1 A g <sup>-1</sup>          |                           |             |
|                               | Chemical polymerization       | 385 F g <sup>-1</sup>         | At 0.5 A g <sup>-1</sup>        | [8] (2013)                |             |
|                               |                               | 362 F g <sup>-1</sup>         | At 1 A g <sup>-1</sup>          |                           |             |
|                               | No                            | Electrospun                   | 267 F g <sup>-1</sup> (***)     | At 0.35 A g <sup>-1</sup> | [9] (2013)  |
|                               |                               | Chemical polymerization       | 261 F g <sup>-1</sup>           | At 0.5 A g <sup>-1</sup>  | [10] (2010) |
| ca. 243 F g <sup>-1</sup> (*) |                               |                               | At 1 A g <sup>-1</sup>          |                           |             |
| Chemical polymerization       |                               | 361 F g <sup>-1</sup>         | At 0.3 A g <sup>-1</sup>        | [11] (2012)               |             |
|                               |                               | 349 F g <sup>-1</sup>         | At 0.5 A g <sup>-1</sup>        |                           |             |
|                               |                               | 323 F g <sup>-1</sup>         | At 1 A g <sup>-1</sup>          |                           |             |
| Chemical polymerization       |                               | 890 F g <sup>-1</sup> (**)    | At 0.5 A g <sup>-1</sup>        | [12] (2013)               |             |
| Chemical polymerization       |                               | 497 F g <sup>-1</sup>         | At 0.5 A g <sup>-1</sup>        | [13] (2012)               |             |

**Note:**

(\*): Calculated from the figure of “Variation of the specific capacitance with current density” in the literature, because the authors did not show the exact number in their publication.

(\*\*): The composites were graphene oxide/carbon nanotube/polyaniline composites.

(\*\*\*): The active materials were pure PANI.

**Reference:**

- [1] T. Lee, T. Yun, B. Park, B. Sharma, H.-K. Song and B.-S. Kim, *J. Mater. Chem.*, 2012, **22**, 21092-21099.
- [2] D. W. Wang, F. Li, J. Zhao, W. Ren, Z. G. Chen, J. Tan, Z. S. Wu, I. Gentle, G. Q. Lu and H. M. Cheng, *ACS Nano*, 2009, **3**, 1745-1752.
- [3] Q. Wu, Y. X. Xu, Z. Y. Yao, A. R. Liu and G. Q. Shi, *ACS Nano*, 2010, **4**, 1963-1970.
- [4] H. P. Cong, X. C. Ren, P. Wang and S. H. Yu, *Energy Environ. Sci.*, 2013, **6**, 1185–1191.

- [5] N. A. Kumar, H. Choi, Y. R. Shin, D. W. Chang, L. Dai and J. Baek, *ACS Nano*, 2012, **6**, 1715-1723.
- [6] S. Liu, X. H. Liu, Z. P. Li, S. R. Yang and J. Q. Wang, *New J. Chem.*, 2011, **35**, 369-374.
- [7] Z.-D. Huang, R. Liang, B. Zhang, Y.-B. He and J.-K. Kim, *Compos. Sci. Technol.*, 2013, **88**, 126-133.
- [8] Y. N. Meng, K. Wang, Y. J. Zhang and Z. X. Wei, *Adv. Mater.*, 2013, **25**, 6985-6990.
- [9] S. Chaudhari, Y. Sharma, P. S. Archana, R. Jose, S. Ramakrishna, S. Mhaisalkar and M. Srinivasan, *J. Appl. Polym. Sci.*, 2013, **129**, 1660-1668.
- [10] K. Zhang, L. L. Zhang, X. S. Zhao and J. Wu, *Chem. Mater.*, 2010, **22**, 1392-1401.
- [11] J. Zhang and X. S. Zhao, *J. Phys. Chem. C*, 2012, **116**, 5420-5426.
- [12] M. K. Liu, Y.-E. Miao, C. Zhang, W. W. Tjiu, Z. B. Yang, H. S. Peng and T. X. Liu, *Nanoscale*, 2013, **5**, 7312-7320.
- [13] B. Ma, X. Zhou, H. Bao, X. W. Li and G. C. Wang, *J. Power Sources*, 2012, **215**, 36-42.

**Table S2** List of cyclic stability values of various graphene/PANI hybrid electrodes from recent literatures.

| Binder-free   | Preparation method            | Capacitance retention | Measurement condition                   | Reference (year) |
|---------------|-------------------------------|-----------------------|-----------------------------------------|------------------|
| Yes(our work) | Electrophoretic deposition    | 84%                   | At 2 A g <sup>-1</sup> ; 1000 cycles    | (2013)           |
| Yes           | Layer-by-layer (LbL) assembly | 90.7%                 | At 3 A g <sup>-1</sup> ; 500 cycles     | [1] (2012)       |
|               | Electropolymerization         | 82%                   | At 5 A g <sup>-1</sup> ; 1000 cycles    | [2] (2013)       |
|               | Vacuum filtration             | 66.8%                 | At 0.5 A g <sup>-1</sup> ; 400 cycles   | [3] (2011)       |
|               | Chemical polymerization       | 90%                   | At 5 A g <sup>-1</sup> ; 5000 cycles    | [4] (2013)       |
|               | Vacuum filtration             | 79%                   | At 3 A g <sup>-1</sup> ; 800 cycles     | [5] (2010)       |
| No            | Chemical polymerization       | 89%                   | At 1 A g <sup>-1</sup> ; 1000 cycles    | [6] (2013)       |
|               | Chemical polymerization       | 87.4%                 | At 3 A g <sup>-1</sup> ; 10000 cycles   | [7] (2013)       |
|               | Chemical polymerization       | 82%                   | At 0.3 A g <sup>-1</sup> ; 10000 cycles | [8] (2012)       |
|               | Chemical polymerization       | 94.3%                 | At 1 A g <sup>-1</sup> ; 2000 cycles    | [9] (2012)       |
|               | Chemical polymerization       | 92%                   | At 1 A g <sup>-1</sup> ; 2000 cycles    | [10] (2010)      |

**Reference:**

- [1] T. Lee, T. Yun, B. Park, B. Sharma, H.-K. Song and B.-S. Kim, *J. Mater. Chem.*, 2012, **22**, 21092-21099.
- [2] H. P. Cong, X. C. Ren, P. Wang and S. H. Yu, *Energy Environ. Sci.*, 2013, **6**, 1185-1191.

- [3] S. Liu, X. H. Liu, Z. P. Li, S. R. Yang and J. Q. Wang, *New J. Chem.*, 2011, **35**, 369-374.
- [4] Y. N. Meng, K. Wang, Y. J. Zhang and Z. X. Wei, *Adv. Mater.*, 2013, **25**, 6985-6990.
- [5] Q. Wu, Y. X. Xu, Z. Y. Yao, A. R. Liu and G. Q. Shi, *ACS Nano*, 2010, **4**, 1963-1970.
- [6] M. K. Liu, Y.-E. Miao, C. Zhang, W. W. Tjiu, Z. B. Yang, H. S. Peng and T. X. Liu, *Nanoscale*, 2013, **5**, 7312-7320.
- [7] H. L. Cao, X. F. Zhou, Y. M. Zhang, L. Chen and Z. P. Liu, *J. Power Sources*, 2013, **243**, 715-720.
- [8] J. Zhang and X. S. Zhao, *J. Phys. Chem. C*, 2012, **116**, 5420-5426.
- [9] B. Ma, X. Zhou, H. Bao, X. W. Li and G. C. Wang, *J. Power Sources*, 2012, **215**, 36-42.
- [10] J. J. Xu, K. Wang, S.-Z. Zu, B.-H. Han and Z. X. Wei, *ACS Nano*, 2010, **4**, 5019-5026.
